# Supplementary material for: Self-assembled organic molecules with a fused aromatic ring as hole-transport layers for inverted perovskite solar cells: the effect of linkers on performance
Source: Royal Society of Chemistry journal article supplement (doi:10.1039/d4nj00154k), 2024-01-01
Supplement: d4nj00154k1.pdf [file d4nj00154k1.pdf]

### Supporting Information

Self-assembled organic molecules with fused aromatic ring as hole-transport layers for inverted perovskite solar cells: the effect of linker on performance

*Haoliang Cheng<sup>a,\*</sup> and Zu-Sheng Huang<sup>b,\*</sup>*

*<sup>a</sup> School of Materials Science and Engineering, NingboTech University, No. 1 South Qianhu Road, Ningbo, P. R. China*

*<sup>b</sup> School of Pharmaceutical Sciences, Wenzhou Medical University, Wenzhou, 325035, PR China*

\*Corresponding author, E-mail address: [haoliang.cheng@nbt.edu.cn](mailto:haoliang.cheng@nbt.edu.cn); [huangzusheng@wmu.edu.cn](mailto:huangzusheng@wmu.edu.cn)

## Experimental Section

**Materials:** *N,N*-dimethylformamide (DMF, 99.8%), dimethyl sulfoxide (DMSO, 99.8%), and chlorobenzene (CB, 99.5%) were purchased from Sigma–Aldrich. PTAA and Methylammonium iodide (MAI, 99.5%) were purchased from Xi’An Polymer Light Technology Corp. Lead iodide ( $\text{PbI}_2$ , 99.9985%) was purchased from Alfa Aesar. [6,6]-Phenyl C61 butyric acid methyl ester (PCBM, 99%) was purchased from American Dye Source, Inc. 2,9-Dimethyl-4,7-diphenyl-1,10-phenanthroline (BCP) was purchased from J&K Scientific Reagent Co. Ltd. All reagents were used as received without further purification.

The two SAMs FNE29<sup>[1]</sup> and DT-1<sup>[2]</sup> are synthesized according to the previous work. The NMR data is measured and listed below:

FNE29: <sup>1</sup>H NMR (400 MHz,  $\text{CD}_2\text{Cl}_2$ ,  $\delta$ ): 8.32 (s, 1H), 7.29–7.31 (m, 2H), 7.17 (t,  $J = 7.2$  Hz, 4H), 6.81–7.01 (m, 11H), 2.63–2.70 (m, 6H), 1.47–1.54 (m, 6H), 1.10–1.30 (m, 18H), 0.73–0.78 (m, 9H).

DT-1: <sup>1</sup>H NMR (400 MHz,  $\text{THF-}d_8$ )  $\delta$  8.42 (s, 1H), 8.12 (s, 1H), 7.67–7.65 (m, 2H), 7.60 (s, 1H), 7.29–7.25 (m, 4H), 7.13–7.09 (m, 6H), 7.05–7.01 (m, 2H), 4.79 (t,  $J = 7.0$  Hz, 2H), 4.61 (m, 4H), 2.20–2.13 (m, 2H), 1.85–1.78 (m, 4H), 1.45–1.32 (m, 6H), 1.16–1.12 (m, 12H), 0.92–0.89 (m, 3H), 0.77–0.73 (m, 6H).

**Device Fabrication:** The In doped tin oxide (ITO, 10  $\Omega$  per square, transmittance 88%, Shenzhen Huayu United Technology Co., Ltd) glass substrates were cleaned by a sonication of 30 min in detergent, deionized water, acetone and isopropyl alcohol before being dried with a nitrogen flow. The cleaned substrates were then treated with plasma for 15 min. The ITO substrates were immersed into the SAMs solutions (0.2 mM FNE29 or DT-1 in  $\text{CH}_2\text{Cl}_2$ ) for 3 h. The ITO substrates were then withdrawn from the SAM solutions and washed with  $\text{CH}_2\text{Cl}_2$  to remove the physically absorbed molecules followed by drying with a nitrogen flow. As for the deposition of perovskite layer, the

perovskite precursor solution containing MAI (1.20 M) and  $\text{PbI}_2$  (1.26 M) in a mixture solvent of DMF and DMSO (volume ratio of 4:1) was spin-coated on the ITO substrates without or with self-assembled dye molecules at 5000 rpm for 33 s, and the anti-solvent (CB, 300  $\mu\text{L}$ ) was quickly dropped onto the center of the substrate at the 13<sup>th</sup> second. Then these films were heated at 60 °C for 30 s and 100 °C for 5 min, respectively. After the above samples were cooled down to room temperature, the PCBM (20 mg  $\text{cm}^{-3}$ ) solution was spun over the above films at 1600 rpm for 30 s. Then the BCP (0.5 mg/mL in isopropanol) solution was spun at 3000 rpm for 30 s. Finally, the films were transferred to a vacuum chamber, and 100 nm thick Ag electrode was deposited on top of the BCP layer with a deposition rate of 1  $\text{\AA s}^{-1}$ . The device area was defined as 0.21  $\text{cm}^2$ . A mask with an aperture area of 0.09  $\text{cm}^2$  is used for all measurements of solar cell performance. For the PTAA based HTL, the PTAA solution (2 mg/mL) is spin-coated on ITO substrate at 5000 rpm for 30 s and heated at 100 °C for 10 min.

**Characterization:** UV-Vis absorption spectra were recorded on a UV-Vis spectrophotometer (Shimadzu UV-2550). Photoluminescence (PL) spectra were measured using a spectrofluorophotometer (RF-5301PC, Shimadzu). Differential pulsed voltammetry (DPV) were performed on an electrochemistry workstation (CHI660C Instruments, Shanghai Chenhua Instrument Corp., Shanghai, China). An Ag/AgNO<sub>3</sub> electrode, an ITO/dye electrode and a Pt electrode were used as the reference electrode, working electrode and counter electrode, respectively, using 0.1 M TBAPF<sub>6</sub> in CH<sub>3</sub>CN as the supporting electrolyte. The electrochemical impedance spectroscopy (EIS) measurement was carried out on an electrochemical workstation (ZAHNER ZENNIUM CIMPS-1, Germany). NMR spectra were measured on Bruker 400 instruments. Contact angles were measured on Dataphysics-OCA20. Film morphology was examined with a field emission scanning electron microscope (FE-SEM-4800-1). Current density–voltage ( $J$ – $V$ ) characteristics of the solar cells were measured at AM1.5G illumination (100  $\text{mW cm}^{-2}$ ) with a computer-controlled Keithley 2420 source

meter and Newport-94043A solar simulator. The active area of each cell was 0.09 cm<sup>2</sup> controlled by a black mask. The steady-state efficiency and photocurrent outputs versus time were measured by applying a bias potential at the maximum power output point. The incident photon-to-electron conversion efficiency (IPCE) spectra were recorded on a SM-250 hyper mono-light system (Bunkoukeiki, Japan). The differential scanning calorimetry (DSC) is measured through thermal analyzer (SDT650).

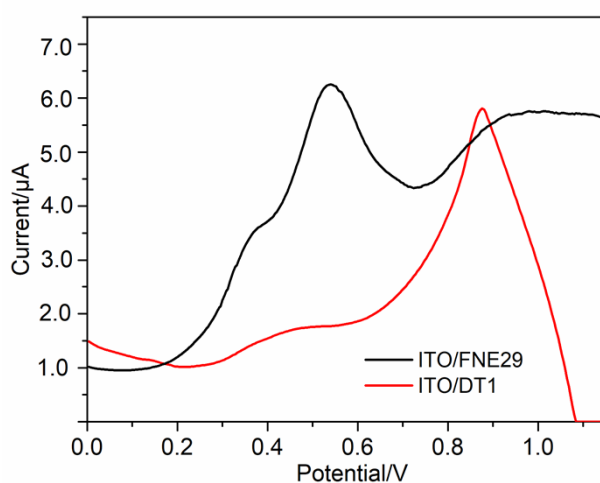

**Figure S1.** DPV curves of ITO/FNE29 and ITO/DT-1. The energy is converted to the vacuum scale according to the formula of  $E_{\text{HOMO}} = -(E_{\text{ox}} + 4.50)$  (eV).

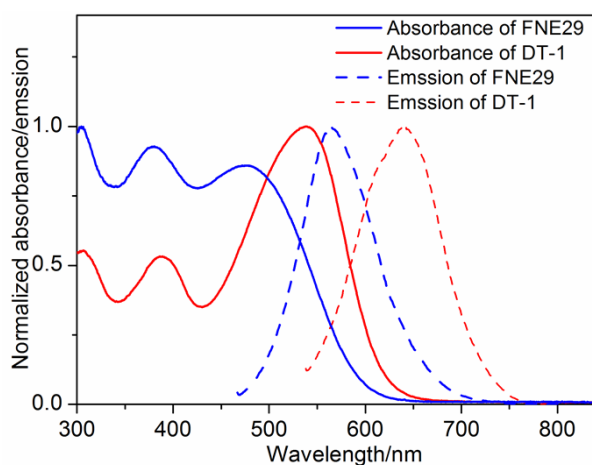

**Figure S2.** Normalized absorption and emission spectra of FNE29 and DT-1 solutions in CH<sub>2</sub>Cl<sub>2</sub>.

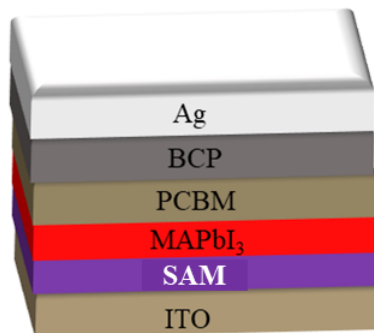

**Figure S3.** The PSC device configuration.

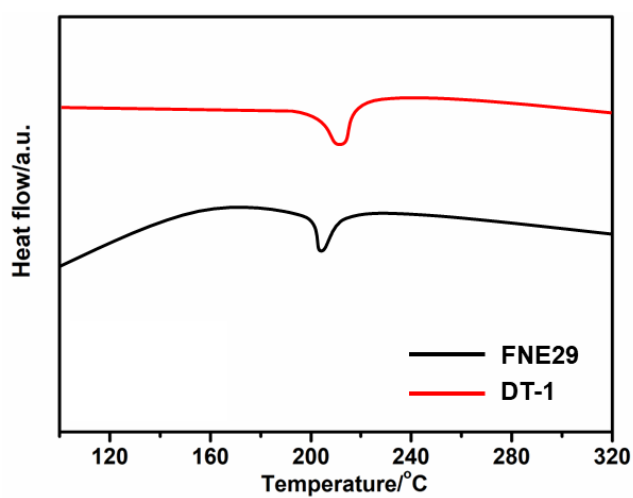

**Figure S4.** Differential scanning calorimetry curves of FNE29 and DT-1.

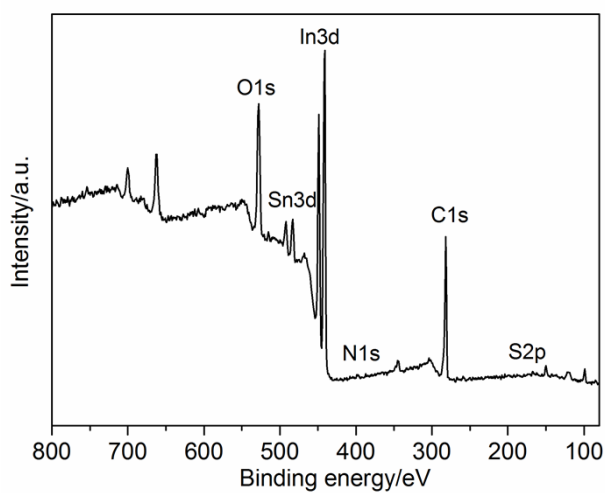

**Figure S5.** The XPS survey spectrum of ITO/FNE29.

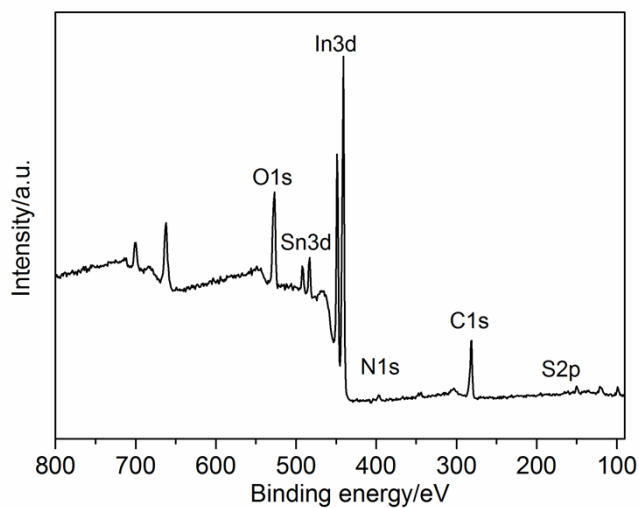

**Figure S6.** The XPS survey spectrum of ITO/DT-1.

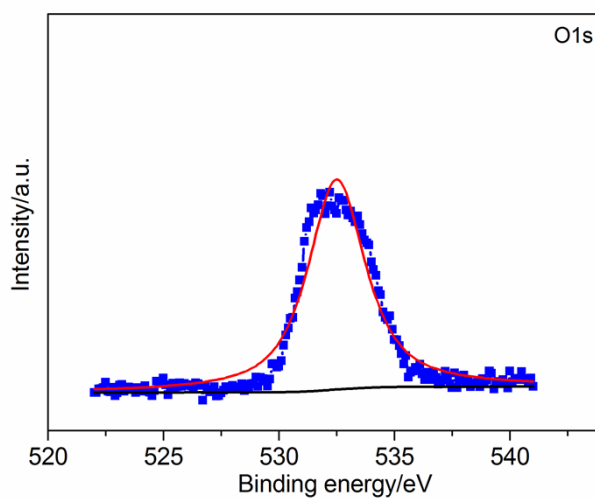

**Figure S7.** The high-resolution O1s XPS spectrum of the DT-1 powder.

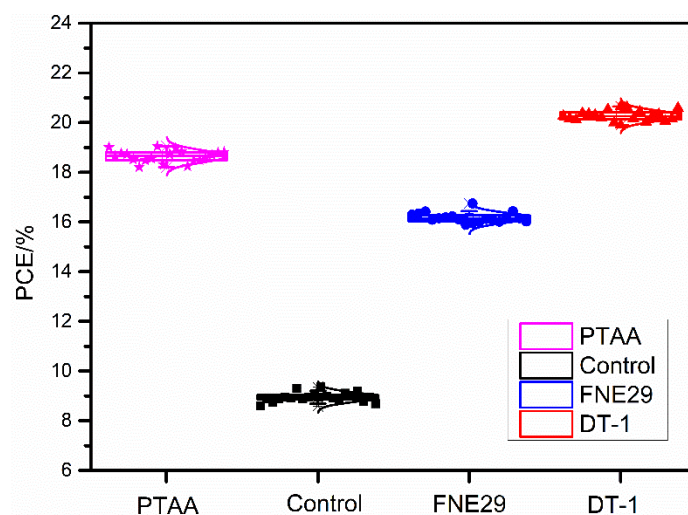

**Figure S8.** The statistic results of PCEs represented in a standard box plot for 20 parallel PSC devices.

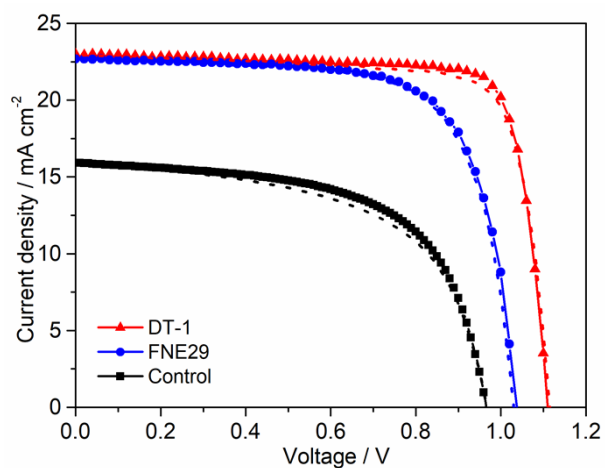

**Figure S9.**  $J$ - $V$  curves of the SAMs based PSC with forward and reverse scan directions.

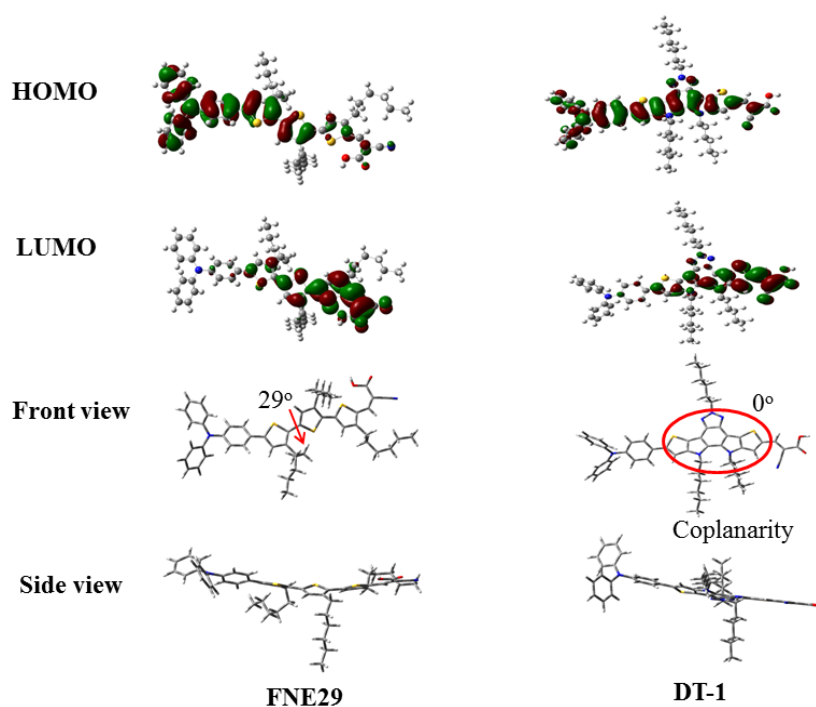

**Figure S10.** Electron distributions and geometrical configurations of FNE29 and DT-1.

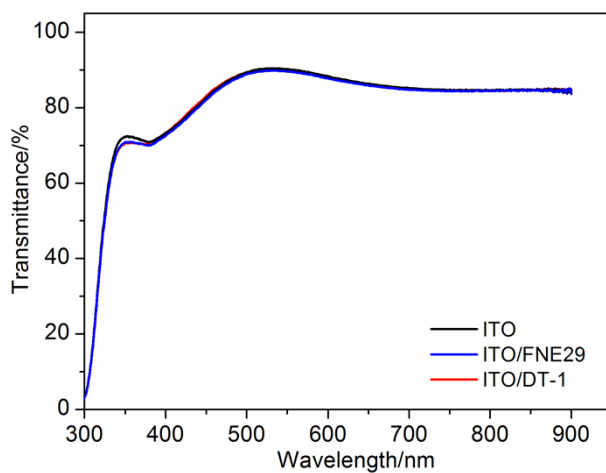

**Figure S11.** Transmittance of the ITO with and without SAMs.

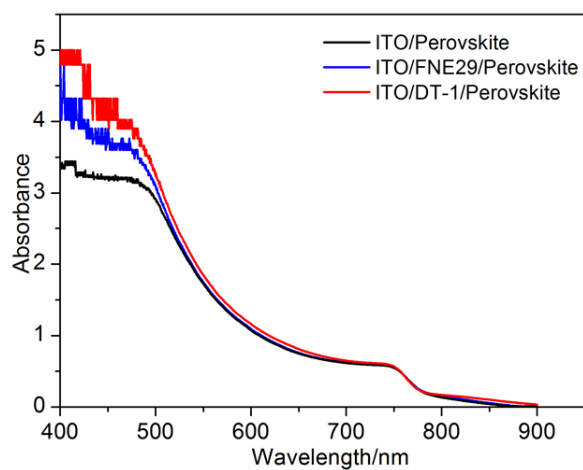

**Figure S12.** UV-vis absorption spectra of the perovskite films without and with SAMs.

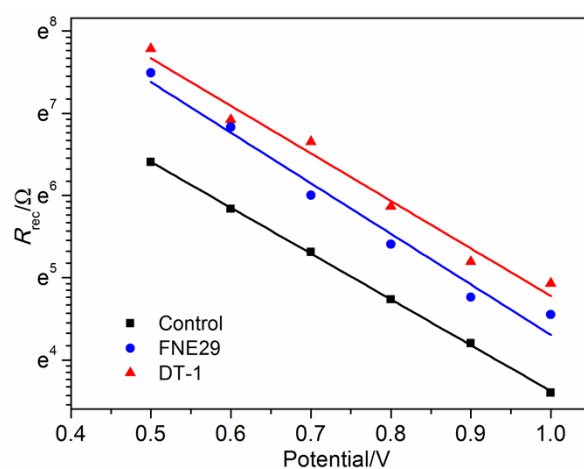

**Figure S13.** The charge recombination resistances ( $R_{rec}$ ) vs. potential for various PSCs.

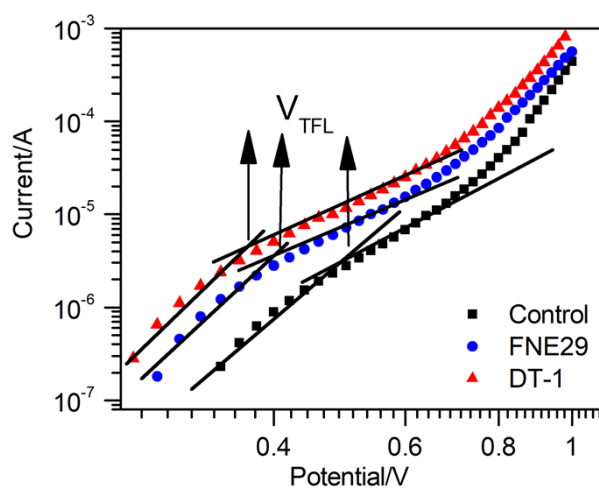

**Figure S14.** The dark current curve of the hole only device with a structure of ITO/SAMs/Perovskite/Spiro-OMeTAD/Au.



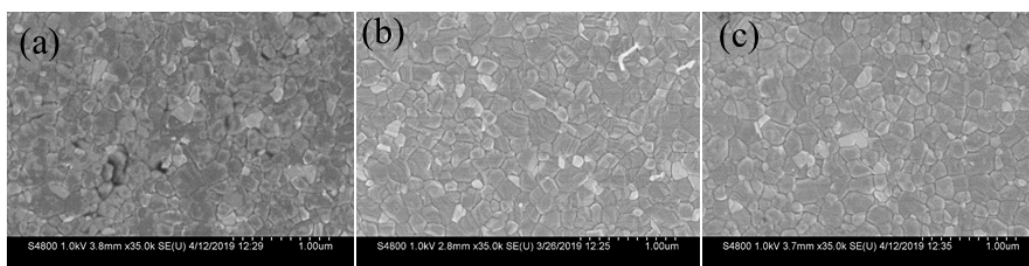

**Figure S15.** The SEM images of perovskite films on (a) ITO, (b) ITO/FNE29, and (c) ITO/DT-1, respectively.

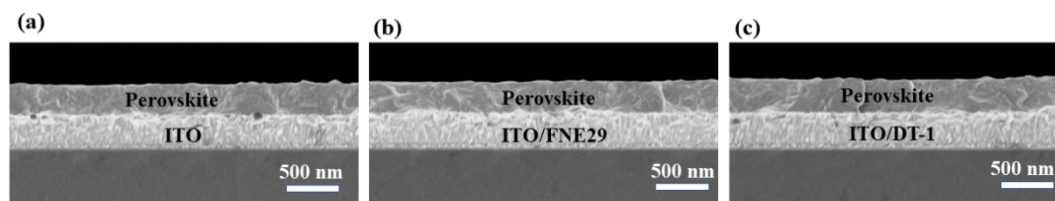

**Figure S16.** The Cross-sectional SEM images of perovskite films on (a) ITO, (b) ITO/FNE29, and (c) ITO/DT-1, respectively.

**Table S1.** Optical, electrochemical and hole mobility data of FNE29 and DT-1.

|       | $\lambda_{\max}$<br>(nm) <sup>a</sup> | $\lambda_{\text{int}}$<br>(nm) <sup>b</sup> | $E_{0-0}$<br>(eV) <sup>c</sup> | HOMO<br>(eV) <sup>d</sup> | LUMO<br>(eV) <sup>f</sup> | Hole mobility<br>(cm <sup>2</sup> V <sup>-1</sup> s <sup>-1</sup> ) <sup>e</sup> |
|-------|---------------------------------------|---------------------------------------------|--------------------------------|---------------------------|---------------------------|----------------------------------------------------------------------------------|
| FNE29 | 478                                   | 532                                         | 2.33                           | -5.04                     | -2.71                     | $2.31 \times 10^{-4}$                                                            |
| DT-1  | 538                                   | 584                                         | 2.12                           | -5.37                     | -3.25                     | $4.34 \times 10^{-4}$                                                            |

<sup>a</sup> Absorption maximum measured in CH<sub>2</sub>Cl<sub>2</sub> with concentration of  $1 \times 10^{-5}$  mol dm<sup>-3</sup>; <sup>b</sup> intersection wavelength obtained from the cross point of normalized absorption and emission spectra in CH<sub>2</sub>Cl<sub>2</sub> solution; <sup>c</sup>  $E_{0-0} = 1240/\lambda_{\text{int}}$ ; <sup>d</sup> the HOMO data obtained from the DPV measurements; the energy is converted to the vacuum scale according to the formula of  $E_{\text{HOMO}} = -(E_{\text{ox}} + 4.50)$  (eV); <sup>e</sup> the hole mobility of the SAMs measured with a device structure of ITO/PEDOT:PSS/SAMs/Ag; <sup>f</sup> the LUMO is calculated according to the formula of  $E_{\text{LUMO}} = (E_{0-0} + E_{\text{HOMO}})$  (eV)

**Table S2.** Photovoltaic performance parameters of each best-performing PSC device. Measurements were performed under different scan directions.

| Device  | Scan directions | $V_{\text{oc}}$ (V) | $J_{\text{sc}}$ (mA cm <sup>-2</sup> ) | $FF$  | $PCE$ (%) | $HI$ (%) |
|---------|-----------------|---------------------|----------------------------------------|-------|-----------|----------|
| Control | Forward         | 0.966               | 15.91                                  | 0.609 | 9.36      | 5.76     |
|         | Reverse         | 0.968               | 16.08                                  | 0.568 | 8.85      |          |

|           |         |       |       |       |       |      |
|-----------|---------|-------|-------|-------|-------|------|
| ITO/FNE29 | Forward | 1.038 | 22.68 | 0.712 | 16.75 | 1.89 |
|           | Reverse | 1.030 | 22.65 | 0.705 | 16.44 |      |
| ITO/DT-1  | Forward | 1.110 | 23.00 | 0.809 | 20.65 | 2.58 |
|           | Reverse | 1.115 | 22.94 | 0.787 | 20.13 |      |
| ITO/PTAA  | Forward | 1.092 | 22.75 | 0.767 | 19.05 | 2.99 |
|           | Reverse | 1.089 | 22.56 | 0.752 | 18.48 |      |

$$HI = (\text{PCE}_{\text{Forward}} - \text{PCE}_{\text{Reverse}}) / \text{PCE}_{\text{reverse}}$$

**Table S3.** The EIS fitting parameters of the as-prepared devices, measured at bias potential of 1 V under dark.

| PSC     | $R_s$ ( $\Omega$ ) | $R_{\text{rec}}$ ( $\Omega$ ) |
|---------|--------------------|-------------------------------|
| Control | 14.4               | 36.5                          |
| FNE29   | 26.8               | 94.5                          |
| DT-1    | 17.5               | 138.2                         |

## References

1. Feng, Q.; Zhou, G.; Wang, Z.-S., Varied Alkyl Chain Functionalized Organic Dyes for Efficient Dye-Sensitized Solar Cells: Influence of Alkyl Substituent Type on Photovoltaic Properties. *J. Power Sources* **2013**, *239*, 16-23.
2. Huang, Z.-S.; Hua, T.; Tian, J.; Wang, L.; Meier, H.; Cao, D., Dithienopyrrolobenzotriazole-Based Organic Dyes with High Molar Extinction Coefficient for Efficient Dye-Sensitized Solar Cells. *Dyes Pigm.* **2016**, *125*, 229-240.
